# Supplementary material for: Ultrahighly nitrogen-doped hollow carbon spheres with hierarchical pores for highly reversible lithium–sulfur batteries
Source: Royal Society of Chemistry journal article supplement (doi:10.1039/d1se01424b), 2021-11-25
Supplement: d1se01424b1.pdf [file d1se01424b1.pdf]

## Supporting Information

### **Ultrahigh Nitrogen-Doped Hollow Carbon Spheres with Hierarchical**

### **Pores for High-Reversibility Lithium-Sulfur Batteries**

*Qingkai Zeng, Xiaolan Li, Jinliang Zhu\*, Guifang Wang, Xiyong Chen, Shaojian Ma and Pei Kang Shen*

Guangxi Key Laboratory of Processing for Non-ferrous Metals and Featured Materials, School of Resources, Environment and Materials, Collaborative Innovation Center of Sustainable Energy Materials, Guangxi University, 100 Daxue Dong Road, Nanning 530004, PR China.

\*Corresponding authors: Email: [jlzhu85@163.com](mailto:jlzhu85@163.com) (Jinliang Zhu)

### **Experimental Section**

### **Preparation of NHCS-x/S, x = 1-3.**

Silica particles (size: 20 nm, 1.5 g), melamine (14 g), and formaldehyde (10 g) were added to 200 mL of water under stirring. The suspension was heated to 60 °C and stirred for 3 h, adjusted to pH = 3, stirred for another 1 h, and then cooled to room temperature to obtain a white precipitate. After centrifugation, the precipitate was dried at 100 °C for 1 h to obtain nano-silica coated with melamine-formaldehyde resin. Carbonization at 800 °C for 2 h in an argon atmosphere produced the nano-silica coated with carbon microspheres. Then, the silica core was removed by soaking in 1000 mL of 10% HF aqueous solution for 5 h. After separation by centrifugation, the final product was washed with deionized water to pH neutral and dried. These ultrahigh nitrogen-doped hollow carbon spheres with hierarchical pores were labeled NHCS-1. NHCS-2 and NHCS-3 were prepared similarly, except that the carbonization temperature was 1000 °C and 1200 °C, respectively. The sulfur electrode materials (NHCS-x/S, x = 1-3) were typically prepared by manually mixing NHCS-x and S in a weight ratio of 1:3 and then heating the mixture at 155 °C for 12 h.

### **Physical characterization.**

XRD patterns were collected using a D/Max-III X-ray diffractometer (Rigaku Co., Japan) with Cu K $\alpha$  radiation, and the voltage and current were 40 kV and 30 mA, respectively. A Raman spectrometer (Horiba Jobin Yvon Inc., France) using a 532-nm He/Ne laser was used to obtain the Raman spectra. The specific surface area and pore size distribution were analyzed using an ASAP 2460 surface area analyzer (Micromeritics Co., USA). The S content was measured using a thermogravimetric analyzer (DSC/TGA; Netzsch STA449 F5 Jupiter) under N<sub>2</sub> from 30 to 850 °C. The conductivity of samples were analyzed by ST-2722 semiconductor resistivity of the powder tester (Suzhou Jingge Electronic Co., Ltd). UV-vis adsorption spectra were measured using an

ultraviolet/visible spectrophotometer (PerkinElmer Lambda650, USA). To characterize the surface composition and chemical state of the samples, X-ray photoelectron spectroscopy (XPS) analysis was performed using an ESCALAB 250 spectrometer with a single-color Al K $\alpha$  radiation source. Field-emission scanning electron microscopy (SEM, SU8820, Hitachi Co., Japan) and transmission electron microscopy (TEM, Titan ETEM G2, USA) were used to analyze the morphology and elemental distribution of the materials.

#### **Visual observation of polysulfide adsorption.**

A Li<sub>2</sub>S<sub>6</sub> solution (5 mmol/L) was prepared by adding a mixture of sulfur and lithium sulfide (molar ratio: 1:5) to a mixed solvent of 1,2-dimethoxyethane/1,3-dioxolane (DME/DOL, 1:1 v/v), followed by stirring for 24 h at 60 °C. To visually observe the polysulfide adsorption, 20 mg of the carbon host was added to 4 mL Li<sub>2</sub>S<sub>6</sub> solution, and photographs were taken after 15h at room temperature. An ultraviolet/visible spectrophotometer was used to investigate the adsorption capacity of the three carbon hosts.

#### **Symmetric cells for cyclic voltammetry analysis.**

To prepare electrodes for the symmetric cells, NHCS-1, NHCS-2, or NHCS-3 was homogeneously mixed with acetylene black and polyvinylidene fluoride (PVDF) at 7:2:1 mass ratio in N-methyl-2-pyrrolidinone (NMP) to form a slurry, which was coated on an aluminum foil with a loading of 0.5 mg cm<sup>-2</sup>. Two identical electrodes were assembled into a 2032 coin cell, and Li<sub>2</sub>S<sub>6</sub> in DOL/DME (0.2 M, 50.0  $\mu$ L) was used as the active species. The cyclic voltammetry (CV) curves were obtained in the voltage range from -0.8 to 0.8 V with a scan rate of 20 mV s<sup>-1</sup>. The frequency range of the electrochemical impedance spectroscopy (EIS) tests was 100 kHz to 10 mHz using

5mV as a voltage amplitude. Both CV and EIS experiments were carried out on an IM6 electrochemical workstation (Zahner-Elektrik, Germany).

### **Nucleation of Li<sub>2</sub>S**

Li<sub>2</sub>S and S (1:7 molar ratio) were dissolved in a mixed solvent of DOL/DME (1:1 v/v) containing 1.0 M lithium bis(trifluoromethanesulfonyl)imide (LiTFSI), followed by vigorous stirring at 80 °C to prepare the Li<sub>2</sub>S<sub>8</sub> electrolyte. The NHCS sample was suspended in ethanol and added dropwise to a piece of carbon cloth (diameter: 14 mm). After drying at 60 °C for 12 h, the working electrode was obtained. The nucleation of Li<sub>2</sub>S was examined in a 2032 coin cell with a Li foil as the counter electrode, Celgard 2400 separator, and NHCS/carbon cloth as the working electrode. The Li<sub>2</sub>S<sub>8</sub> catholyte (30 μL) was dropped onto the counter working electrode, and 30 μL of blank electrolyte with 1wt% LiNO<sub>3</sub> and no Li<sub>2</sub>S<sub>8</sub> was added to the counter electrode. The cells were discharged galvanostatically at 0.112 mA to 2.11 V and kept potentiostatically at 2.10 V with a battery testing system (Shenzhen Neware Battery Co).

### **Density functional theory calculation**

First-principles calculations were performed within the framework of density functional theory (DFT) using the projector-augmented plane-wave method. The Perdew-Burke-Ernzerhof type gradient-corrected exchange-correlation potential was employed. A cutoff energy of 500 eV was used for the plane wave basis set, and a vacuum layer of 15 Å was set along the Z direction to avoid interactions between periodic images. All atoms were allowed to completely relax until the force on each was less than 0.01 eV/Å. The DFT-D3 method was used to describe dispersion interactions. The interaction energy between the adsorbate and substrate was calculated as  $\Delta E = E_{\text{sub/ad}} - E_{\text{ad}} - E_{\text{sub}}$ ,

where  $E_{\text{sub/ad}}$  represents the energy of the whole absorption system,  $E_{\text{ad}}$  is that of the adsorbate, and  $E_{\text{sub}}$  is that of the substrate.

### **Electrochemical measurements**

To prepare the cathode, a homogeneous slurry was prepared by mixing 70 wt% NHCS- $x$  ( $x=1,2,3$ ), 20 wt% acetylene black, and 10 wt% PVDF in NMP. The slurry was spread on an aluminum foil (diameter: 14 mm) and dried at 50 °C overnight with a sulfur loading of 1.2 mg cm<sup>-2</sup>. Half cells of the 2032 coin type were fabricated using the NHCS- $x$ /S composite as cathode and Li metal as counter electrode. The electrolyte contained 1.0 M LiTFSI and 1 wt% LiNO<sub>3</sub> as additive in DOL+DME (1:1, v/v). The electrochemical performances were measured on a battery testing system (Shenzhen Neware Battery Co., China) at 1.7-2.8 V. CV tests were carried out on a IM6 electrochemical workstation (Zahner-Elektrik, Germany) in the potential range of 1.7-2.8 V with a rate of 0.1 mV s<sup>-1</sup>. EIS analysis was performed in a frequency range from 100 kHz to 10 mHz using 5mV as a voltage amplitude.

### **In situ Raman spectroscopy and in situ XRD measurements**

A Li-S battery equipped with a quartz window (Beijing Scistar Technology Co. Ltd., China) was used to record the *in situ* Raman spectra in the wavenumber range of 50-600 cm<sup>-1</sup>. While the battery was charged and discharged at a current density of 0.2C, Raman data were collected in steps of 0.1 V. The in situ XRD experiments used a polyimide film (Beijing Scistar Technology Co., Ltd.). The diffraction patterns were recorded in the  $2\theta$  of 22-30° every 0.1 V while the battery was charged and discharged at a current density of 0.2 C.

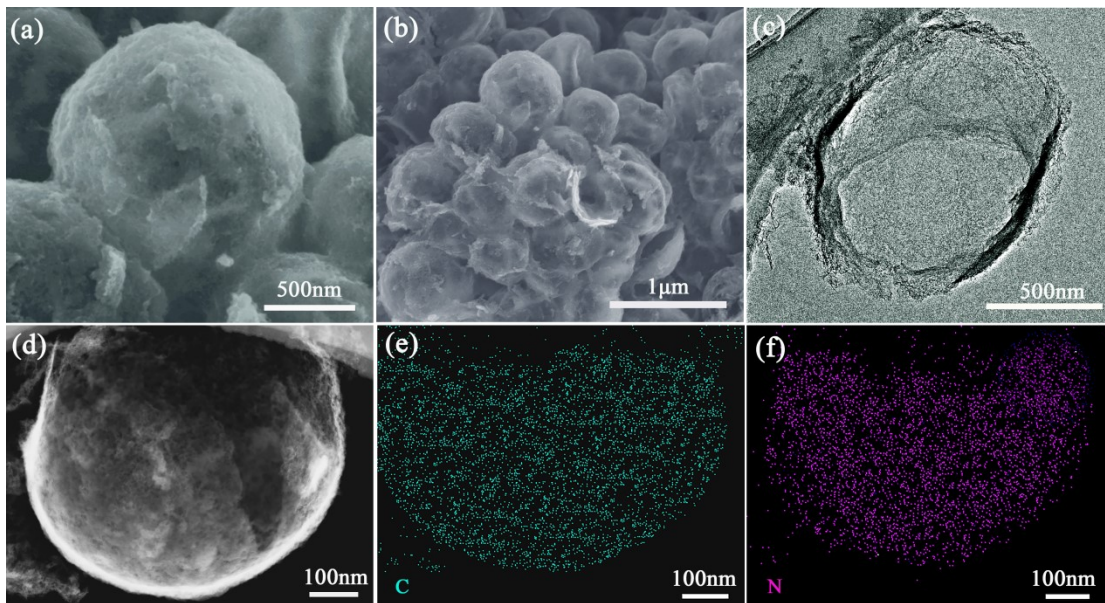

**Fig. S1** (a-b) SEM images of NHCS-1. (c) TEM and (d)STEM images of NHCS-1. (e-f) elemental mappings of NHCS-1.

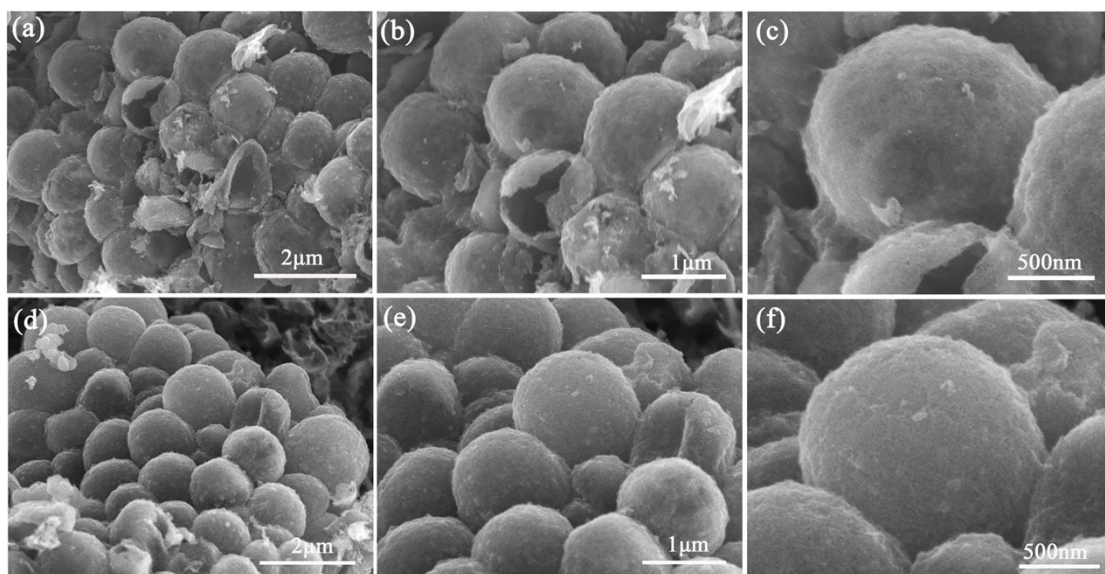

**Fig. S2** (a-c) SEM images of NHCS-2. (d-f) SEM images of NHCS-3.

**Table S1.** Nitrogen content and different nitrogen composition of NHCS samples.

|        | N content | Pyridinic N | Pyrrolic N | Graphitic N |
|--------|-----------|-------------|------------|-------------|
| NHCS-1 | 18.94 at% | 8.71 at%    | 9.49 at%   | 0.74 at%    |
| NHCS-2 | 7.87 at%  | 2.48 at%    | 4.00 at%   | 1.39 at%    |
| NHCS-3 | 3.08 at%  | 0.50 at%    | 2.06 at%   | 0.52 at%    |

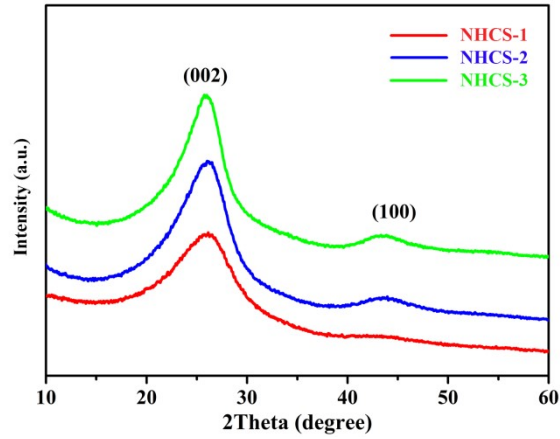

**Fig. S3** XRD patterns of NHCS-1, NHCS-2 and NHCS-3

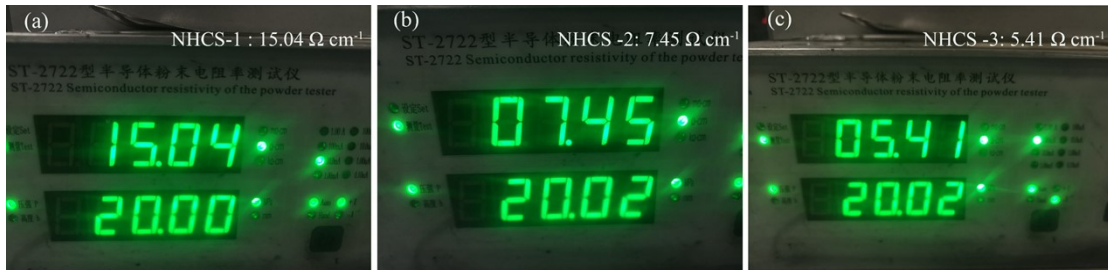

**Fig. S4** (a-c) Conductivity of NHCS-1, NHCS-2 and NHCS-3



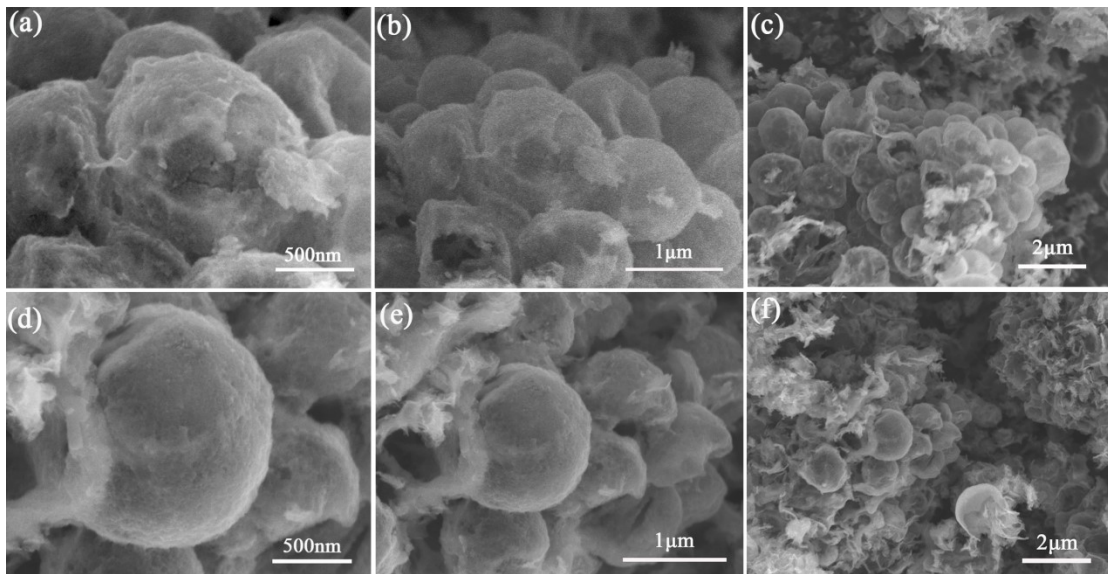

**Fig. S5** (a-c) SEM images of NHCS-2/S. (d-f) SEM images of NHCS-3/S

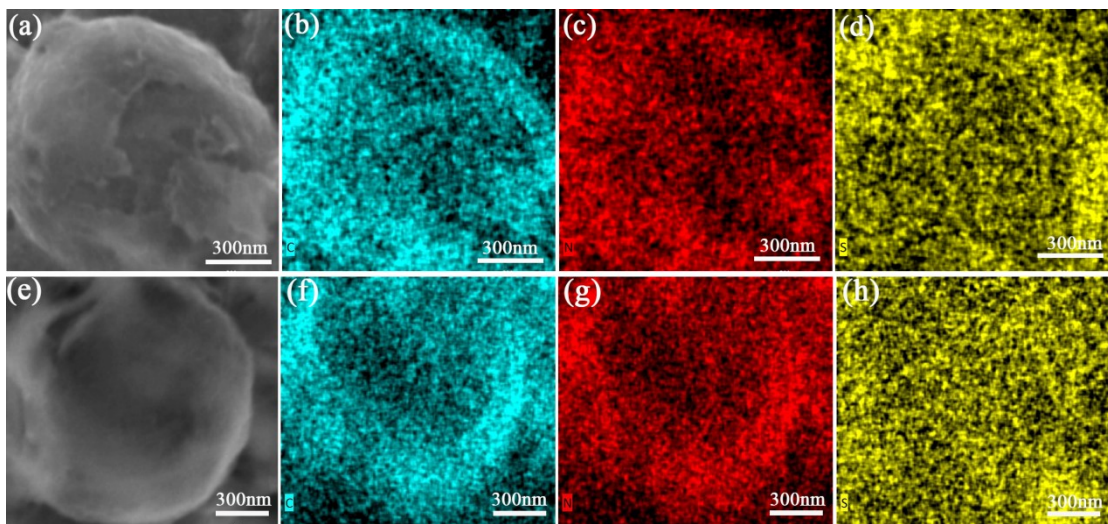

**Fig. S6** (a-d) Elemental mapping images of NHCS-2/S. (e-f) Elemental mapping images of NHCS-3/S.



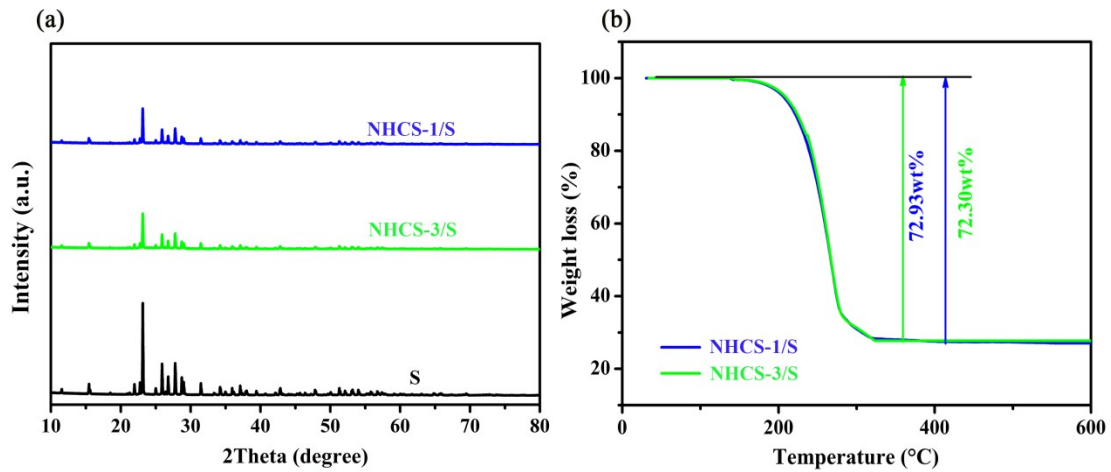

**Fig. S7** (a) XRD patterns of NHCS-2/S, NHCS-3/S and (b) TG curves of NHCS-2/S and NHCS-3/S.

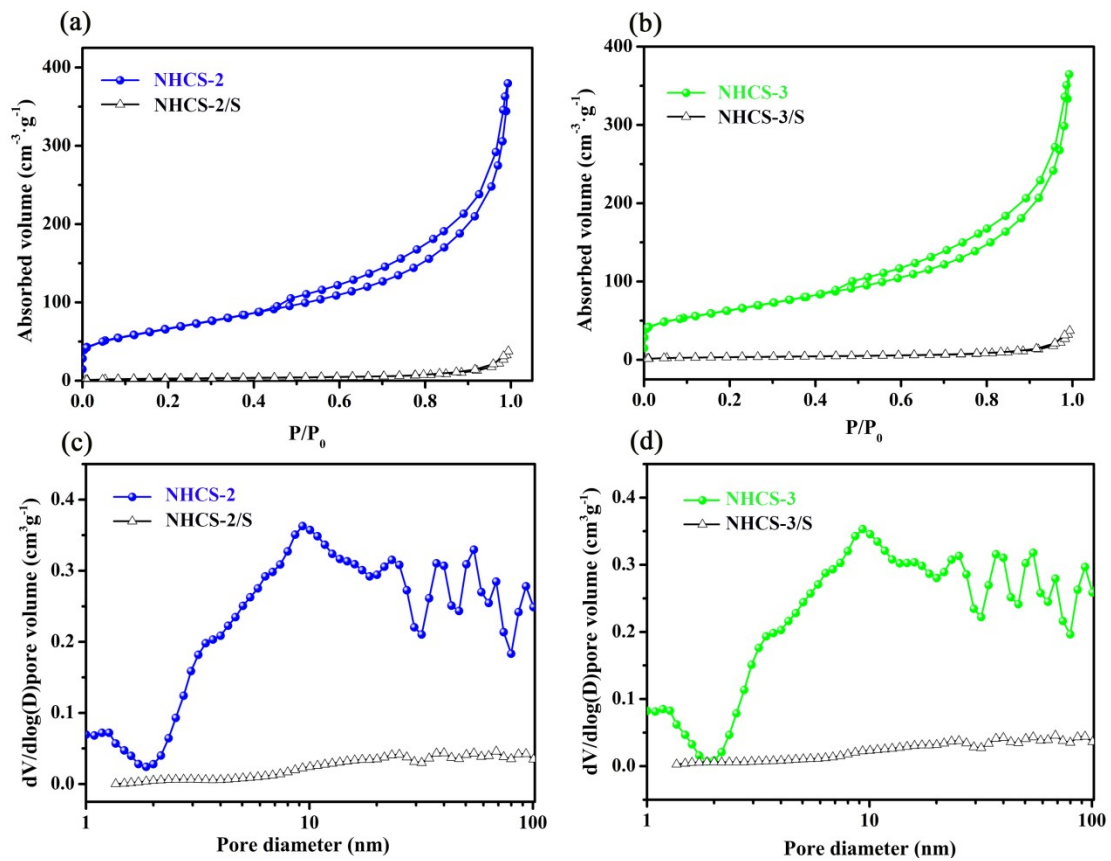

**Fig. S8** (a)  $N_2$  adsorption-desorption isotherms of NHCS-2 and NHCS-2/S and (b)  $N_2$  adsorption-desorption isotherms of NHCS-3 and NHCS-3/S. (c) pore size distributions of NHCS-2 and NHCS-2/S and (d) pore size distributions of NHCS-3 and NHCS-3/S.

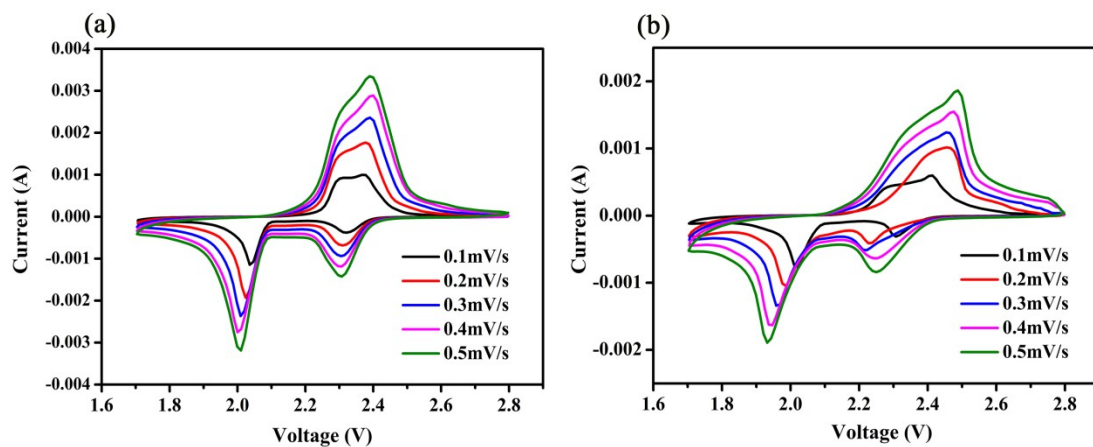

Fig. S9 CV curves of (a)NHCS-2/S and (b) NHCS-3/S at different scan rates

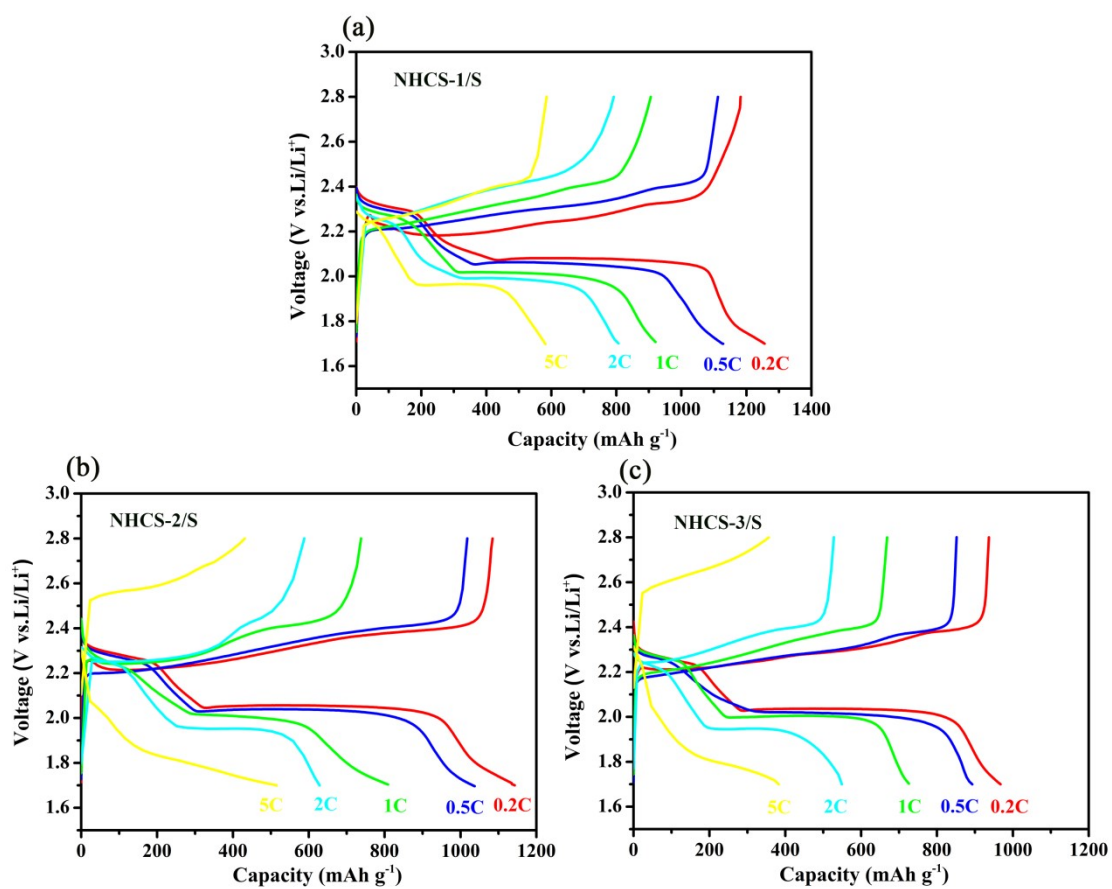

Fig. S10 Charge-discharge profiles at different current density of NHCS-1/S, NHCS-2/S and NHCS-3/S.

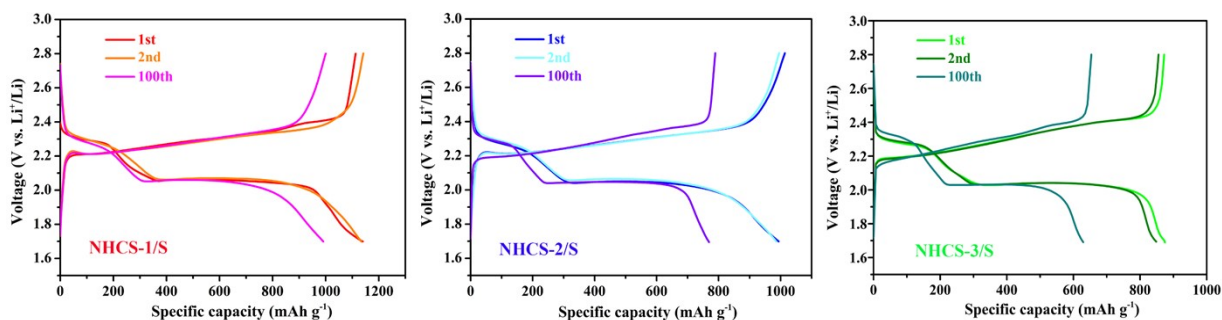

**Fig. S11** Charge-discharge profiles of NHCS-1/S, NHCS-2/S and NHCS-3/S for the 1st, 2nd, and 100th cycles at 0.5C.

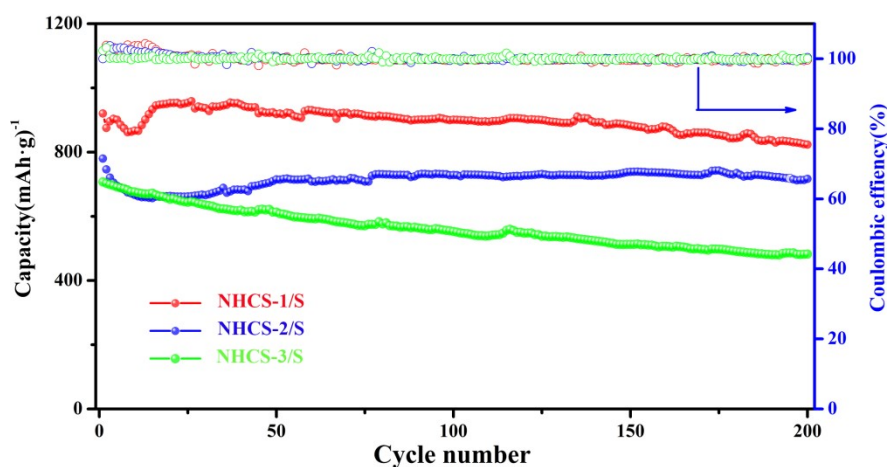

**Fig. S12** Long-term cycling performance of NHCS-1/S, NHCS-2/S and NHCS-3/S for 200 cycles at the current density of 1C.

**Table S2.** Initial capacity, capacity after cycling and capacity retention of NHCS-1/S, NHCS-2/S and NHCS-3/S.

| Sample   | Initial capacity<br>(mAh g <sup>-1</sup> ) | Capacity after cycling<br>(mAh g <sup>-1</sup> ) | Capacity retention (%) |
|----------|--------------------------------------------|--------------------------------------------------|------------------------|
| NHCS-1/S | 920.33                                     | 823.56                                           | 89.48                  |
| NHCS-2/S | 780.13                                     | 713.32                                           | 91.43                  |
| NHCS-3/S | 707.49                                     | 479.17                                           | 67.73                  |

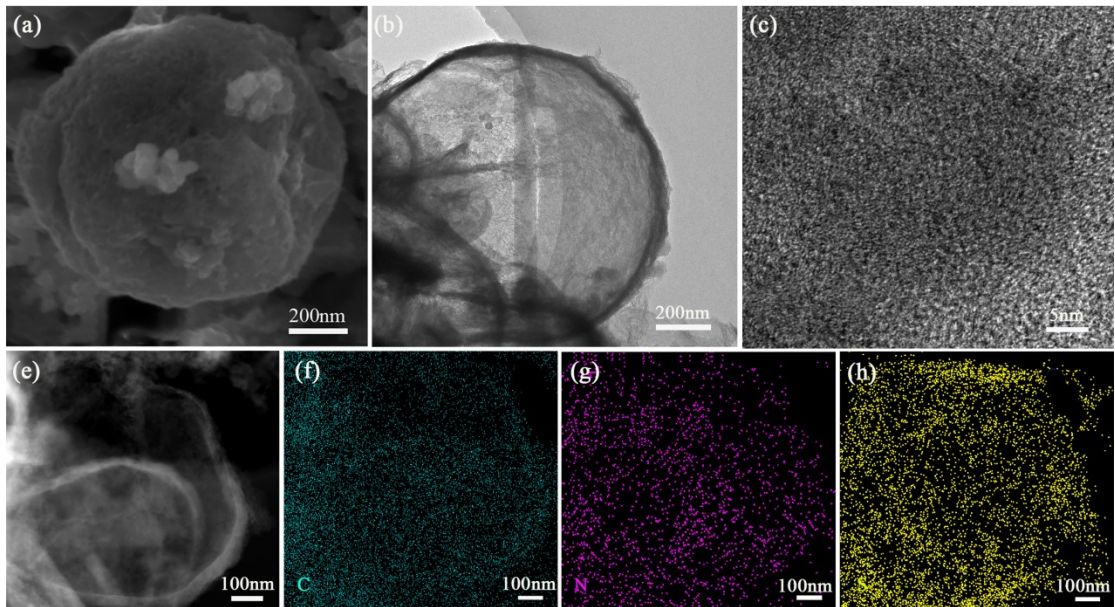

**Fig. S13** (a) SEM image of NHCS-1/S after cycling tests. (b) TEM images of NHCS-1/S after cycling tests. (c) HRTEM image of NHCS-1/S after cycling test. (e-g) Elemental mappings of NHCS-1/S after cycling test.

**Table S3.** Comparison of NHCS-1/S with carbon materials recently reported in literatures for Li-S batteries

|             | Sulfur content | C-rate | Cycle number | Initial capacity (mAh g <sup>-1</sup> ) | Reversible capacity (mAh g <sup>-1</sup> ) | Capacity decay rate per cycle | High-rate-Capability (mAg h <sup>-1</sup> ) | Ref.      |
|-------------|----------------|--------|--------------|-----------------------------------------|--------------------------------------------|-------------------------------|---------------------------------------------|-----------|
| NHCS-1/S    | 71.8%          | 0.5C   | 100          | 1138.6                                  | 991.3                                      | 0.129%                        | 804.9 (2C)                                  | This work |
|             |                | 1C     | 200          | 920.3                                   | 823.6                                      | 0.05%                         | 637.1 (5C)                                  |           |
|             |                | 2C     | 500          | 806.5                                   | 691.3                                      | 0.028%                        |                                             |           |
| BOC@CNT/S   | 72.4%          | 1C     | 500          | 1210                                    | 794                                        | 0.07%                         | 768 (2C)<br>636 (5C)                        | S1        |
|             |                | 0.5C   | 200          | 992                                     | 735                                        | 0.129%                        | 562 (2C)<br>462 (3C)                        | S2        |
| N-HC/S      | 64.3%          | 1C     | 1000         | 721.8                                   | 360.9                                      | 0.05%                         | 467.4 (2C)<br>208.3 (3C)                    | S3        |
| MHCSs/S     | 73%            | 1C     | 500          | 1196                                    | 630                                        | 0.158%                        | 715 (2C)<br>592 (5C)                        | S4        |
| NPDSCS-S    | 72.4%          | 0.5C   | 100          | 1106                                    | 975                                        | 0.116%                        | 826 (2C)                                    | S5        |
|             |                | 1C     | 500          | 952                                     | 814                                        | 0.029%                        | 697 (3C)                                    |           |
| CF@G/S      | 78%            | 0.5C   | 1000         | 1203.2                                  | 721.9                                      | 0.04%                         | 464.6 (2C)                                  | S6        |
|             |                | 1C     | 1000         | 1016.8                                  | 508.4                                      | 0.05%                         |                                             |           |
| S/PCMSs/S   | 70%            | 0.5C   | 700          | 932                                     | 489                                        | 0.067%                        | 830 (2C)<br>780 (3C)<br>742 (4C)            | S7        |
|             |                | 0.5C   | 500          | 977                                     | 607                                        | 0.07%                         |                                             |           |
| 3DCNF/S     | 60%            | 1C     | 300          | 800                                     | 544                                        | 0.106%                        | -                                           | S8        |
|             |                | 0.5C   | 500          | 977                                     | 607                                        | 0.07%                         |                                             |           |
| G-HPC/S     | 67.5%          | 0.5C   | 100          | 854.0                                   | 792.6                                      | 0.071%                        | 761.4 (1C)<br>433.6 (2C)                    | S9        |
| NCNTs-CS/S  | 70%            | 1C     | 700          | 889                                     | 564                                        | 0.052 %                       | 618 (2C)                                    | S10       |
| PGC@HEW C/S | 57.5%          | 1C     | 400          | 921                                     | 795                                        | 0.034%                        | 817 (2C)                                    | S11       |
| HNPC-S      | 65%            | 0.5C   | 400          | 1010                                    | 788                                        | 0.055%                        | 781(2C)                                     | S12       |
|             |                | 2C     |              | 785                                     | 562                                        | 0.032%                        | 623 (5C)                                    |           |

## References

- [S1] X. Chen, Y. Xu, F. H. Du, Y. Wang, *Small Methods*, 2019, **3**, 1900338.
- [S2] M. Yan, H. Chen, Y. Yu, H. Zhao, C. F. Li, Z. Y. Hu, P. Wu, L. Chen, H. Wang, D. Peng, H. Gao, T. Hasan, Y. Li, B. L. Su, *Adv. Energy Mater.*, 2018, **8**, 1801066.
- [S3] J. S. Yeon, S. H. Park, J. Suk, H. Lee, H. S. Park, *Chem. Eng. J.*, 2020, **382**, 122946.
- [S4] M. Chen, Z. Su, K. Jiang, Y. Pan, Y. Zhang, D. Long, *J. Mater. Chem. A*, 2019, **7**, 6250-6258.
- [S5] J. Wang, H. Yang, Z. Chen, L. Zhang, J. Liu, P. Liang, H. Yang, X. Shen, Z. X. Shen, *Adv. Sci.*, 2018, **5**, 1800621.
- [S6] H. Xu, Y. Liu, Q. Bai, R. Wu, *J. Mater. Chem. A*, 2019, **7**, 3558-3562.
- [S7] S. Liu, T. Zhao, X. Tan, L. Guo, J. Wu, X. Kang, H. Wang, L. Sun, W. Chu, *Nano Energy*, 2019, **63**, 103894.
- [S8] S. Feng, J. Song, S. Fu, C. Zhu, Q. Shi, M. K. Song, D. Du, Y. Lin, *J. Mater. Chem. A*, 2017, **5**, 23737-23743.
- [S9] W. Deng, X. Zhou, Q. Fang, Z. Liu, *J. Mater. Chem. A*, 2017, **5**, 13674-13682.
- [S10] Y. Tan, Z. Zheng, S. Huang, Y. Wang, Z. Cui, J. Liu, X. Guo, *J. Mater. Chem. A*, 2017, **5**, 8360-8366.
- [S11] H. Wu, L. Xia, J. Ren, Q. Zheng, C. Xu, D. Lin, *J. Mater. Chem. A*, 2017, **5**, 20458-20472.
- [S12] Z. Li, Z. Xiao, S. Wang, Z. Cheng, P. Li, R. Wang, *Adv. Funct. Mater.*, 2019, **29**, 1902322.
